# Supplementary material for: Parasitic Arthropods of Soricinae Shrews in North-Eastern Poland
Source: MDPI journal article supplement (doi:10.3390/ani13182960), 2023-09-19
Supplement: s1 [file s1]

## Article

# Parasitic arthropods of Soricinae shrews in north-eastern Poland. Supplementary data.

Grzegorz Karbowski<sup>1, 2\*</sup>, Michal Stanko<sup>3</sup>, Katerina Smahol<sup>1, 4</sup>, Joanna Werszko<sup>1, 5</sup> and Leszek Rychlik<sup>6</sup>

<sup>1</sup> W. Stefański Institute of Parasitology, Polish Academy of Sciences, 00-818 Warsaw, Poland; grzgrz@twarda.pan.pl

<sup>2</sup> University of Social and Medical Sciences in Warsaw, 04-367, Warsaw, Poland; g.karbowski@usmbm.edu.pl

<sup>3</sup> Institute of Parasitology, Slovak Academy of Sciences, 040 01, Kosice, Slovak Republic; stankom@saske.sk

<sup>4</sup> Museum and Institute of Zoology, Polish Academy of Sciences, 00-679 Warsaw, Poland; horizont1254@gmail.com

<sup>5</sup> Department of General Biology and Parasitology, Medical University of Warsaw, 02-004 Warsaw, Poland; joanna.werszko@gmail.com

<sup>6</sup> Department of Systematic Zoology, Institute of Environmental Biology, Faculty of Biology, Adam Mickiewicz University, 61-614 Poznań, Poland; rychliklesz@gmail.com

\* Correspondence: g.karbowski@usmbm.edu.pl

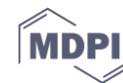

Table S1. List of *Sorex araneus*, *Sorex minutus*, *Neomys fodiens*, *Neomys anomalus* ectoparasites in Central Europe, according to various authors. The borders of Central Europe according to Wojtanowicz [61] include:

Northern border- North Sea, Baltic;

Western border - Passage North Sea-Adriatic, Baltic – Black Sea; Rhine river;

Eastern border - Dniepr and Dvina rivers;

Southern border – Black Sea in the South-East, Danube and Sava rivers, ridge of the Alps in the South-West.

Classification after Wegner [16], Skuratowicz [12], Krasnov [62], Krantz and Walter [63], and Guglielmo et al. [25].

|                                                  | <i>Sorex araneus</i><br>Linnaeus, 1758                                          | <i>Sorex minutus</i> Linnaeus,<br>1766                              | <i>Neomys fodiens</i> (Pennant,<br>1771)         | <i>Neomys anomalus</i> Cabrera,<br>1907.  |
|--------------------------------------------------|---------------------------------------------------------------------------------|---------------------------------------------------------------------|--------------------------------------------------|-------------------------------------------|
| <b>Acari, Ixodidae</b>                           |                                                                                 |                                                                     |                                                  |                                           |
| <i>Dermacentor marginatus</i> (Sulzer, 1776)     | Slovakia [50]                                                                   |                                                                     |                                                  |                                           |
| <i>Dermacentor reticulatus</i> (Fabricius, 1794) | Slovakia [32,50-51,64]                                                          | Slovakia [50,64]                                                    |                                                  |                                           |
| <i>Haemaphysalis concinna</i> Koch, 1844         | Austria [65], Slovakia [49,51,66]                                               | Slovakia [49]                                                       |                                                  |                                           |
| <i>Ixodes apronophorus</i> (Schulze, 1924)       | Poland [14,54,], Slovakia [67]                                                  |                                                                     | Poland [14]                                      |                                           |
| <i>Ixodes ricinus</i> (Linnaeus, 1758)           | Germany [5,68], Poland [14, 29,57,69-73], Czech [74], Slovakia [45,51,66,75-76] | Poland [14,29,57,69], Austria [65], Czech [74], Slovakia [66]       | Poland [14,29,72-73], Czech [74], Slovakia [77]  | Poland [59], Czech [74], Slovakia [74,77] |
| <i>Ixodes trianguliceps</i> Birula, 1895         | Germany [5,68,78], Poland [29,70,72-73], Austria [79], Slovakia [45-47,80-82]   | Poland [29,57,70,72-73], Austria [65,79], Slovakia [45-47,66,81-83] | Poland [29,70], Austria [65] Slovakia [45,66,77] | Poland [70], Slovakia [75-77]             |

**Acari, Ologamasidae**

*Cyrtolaelaps minor* Willman, 1952: Poland [72-73], Slovakia [77,84-87]

*Cyrtolaelaps mucronatus* G. et R. Canestrini, 1881 Germany [88], Poland [29,70,72], Slovakia [46,77,84-86,90] Poland [29,57,72] Poland [29, 59, 72-73], Slovakia [77,83,85-86] Poland [59], Slovakia [36], Hungary [91]

**Acari, Parasitidae**

*Androlaelaps fahrenholzi* (Berlese, 1911) Poland [57,70], Czech [92 (as *Haemolaelaps glasgowi*)], Slovakia [89-90] Poland [59], Slovakia [77,85-86]

*Androlaelaps sardous* Berlese, 1911 Slovakia [85-86] Slovakia [85-86]

*Eulaelaps stabularis* C.L.Koch, 1836 Germany [88], Poland [29,57-58,70,73], Slovakia [82,84-86,89] Poland [29,58], Slovakia [84] Poland [58,73], Slovakia [77,85-86,89] Poland [58,70,73], Slovakia [36,86]

*Haemogamasus ambulans* (Thorell, 1872) Slovakia [15]

*Haemogamasus bregetovae* Mrciak, 1958 Poland [58] Poland [58] Poland [58] Poland [58]

*Haemogamasus hirsutosimilis* Willmann, 1952 Poland [58,70], Czech [92], Slovakia [93] Slovakia [93] Poland [29-58], Slovakia [85-87,93] Austria [94], Hungary [91]

*Haemogamasus hirsutus* Berlese, 1889 Poland [29,57-58,70-71,73], Czech [92], Slovakia [82,84,89] Poland [58,70], Slovakia [85] Poland [20, 32], Czech [92], Slovakia [36,77,85-86,93] Poland [85,73], Hungary [91]

*Haemogamasus horridus* Michael, 1892 Germany [88 (as *Eu-haemogamasus horridus*)], Poland [29,57-58,70,72-73], Austria [94], Slovakia [46,86] Poland [58,72], Slovakia [85-86,77] Poland [58,70], Slovakia [36], Hungary [91]

|                                                                          |                                                                                                |                                                                    |                                                                  |                                                                                  |
|--------------------------------------------------------------------------|------------------------------------------------------------------------------------------------|--------------------------------------------------------------------|------------------------------------------------------------------|----------------------------------------------------------------------------------|
| <i>Haemogamasus nidi</i> Michael, 1892                                   | Poland [29,57,70-73], Austria [94], Slovakia [31,85-86,89,93]                                  | Poland [70], Slovakia [93], Hungary [91]                           | Poland [72], Slovakia [36,77,85,87,89,93]                        | Poland [70,72-73], Slovakia [36,82,84-85], Hungary [91]                          |
| <i>Hirstionyssus isabellinus</i> (Oudemans, 1913) s. Evans et Till, 1966 | Poland [29,57,70-71,73 (as <i>Echinonyssus isabellinus</i> )], Slovakia [30,46,76-77,82,84,95] | Slovakia [82,84]                                                   | Poland [72 (as <i>Echinonyssus isabellinus</i> )], Slovakia [93] | Poland [58]                                                                      |
| <i>Hirstionyssus soricis</i> Turk, 1945                                  | Poland [57,70-71, 73 (as <i>Echinonyssus soricis</i> )], Slovakia [82,84-85]                   | Poland [72,73 (as <i>Echinonyssus soricis</i> )], Slovakia [82,84] | Poland [29,73 (as <i>Echinonyssus soricis</i> )], Slovakia [77]  | Poland [70,73 (as <i>Echinonyssus soricis</i> )], Slovakia [36,77], Hungary [91] |
| <i>Hirstionyssus sunci</i> Wang, 1962                                    |                                                                                                |                                                                    | Slovakia [77, 85, 93 (all as <i>H. apodemi</i> )]                |                                                                                  |
| <i>Holoparasitus coronarius</i> Karg, 1971                               | Slovakia [84]                                                                                  |                                                                    |                                                                  |                                                                                  |
| <i>Holoparasitus excipulciger</i> (Berlese, 1905)                        | Slovakia [51]                                                                                  |                                                                    |                                                                  |                                                                                  |
| <i>Hyperlaelaps microti</i> (Ewing, 1953)                                | Poland [29,57,70-73], Czech [92 (as. <i>H. arvalis</i> )], Slovakia [85,93]                    | Poland [29,70], Slovakia [93]                                      |                                                                  | Poland [70]                                                                      |
| <i>Laelaps agilis</i> C.L.Koch, 1836                                     | Poland [29,70,72-73], Austria [94], Slovakia [31,85-86,89,93,96]                               | Poland [29,73], Slovakia [31,86], Hungary [91]                     | Poland [29], Slovakia [36,85-86,77,93]                           | Poland [58], Slovakia [36,86,93], Hungary [91]                                   |
| <i>Laelaps clethrionomydis</i> Lange, 1955                               | Slovakia [82,84-86,93,96]                                                                      | Slovakia [82,84,93]                                                | Slovakia [93]                                                    | Poland [58]                                                                      |
| <i>Laelaps hilaris</i> Koch 1836                                         | Poland [29,70-73], Austria [94], Czech [92], Slovakia [76-77,85-87,96]                         | Poland [29,70], Slovakia [82,84-87,93 42-45, 55]                   | Slovakia [77,85-86]                                              | Poland [70], Slovakia [36]                                                       |
| <i>Laelaps jettmari</i> Vitzthum, 1930                                   | Poland [57 (as <i>Laelaps pav-</i>                                                             |                                                                    |                                                                  |                                                                                  |

|                                                                          |                                                   |                               |                     |                                                |
|--------------------------------------------------------------------------|---------------------------------------------------|-------------------------------|---------------------|------------------------------------------------|
|                                                                          | <i>lovskyi</i> ], Slovakia [89]                   |                               |                     |                                                |
| <i>Laelaps muris</i> (Ljungh, 1799)                                      | Austria [94], Slovakia [93]                       |                               | Czech [92]          |                                                |
| <i>Myonyssus ingricus</i> Bregetova, 1956                                | Poland [57,70], Austria [94], Slovakia [82,84,93] | Poland [70]                   | Slovakia [31,36,93] | Poland [70,73], Slovakia [36,93], Hungary [91] |
| <b>Acari, Trombiculidae</b>                                              |                                                   |                               |                     |                                                |
| <i>Leptotrombidium europaeum</i> (Daniel and Brehl, 1959)                | Poland [70], Slovakia [97]                        |                               |                     |                                                |
| <i>Leptotrombidium silvaticum</i> (Huscha, Schluger, 1967)               |                                                   |                               | Poland [58]         |                                                |
| <i>Trombicula (Neotrombicula) autumnalis</i> (Shaw, 1790)                | Germany [88], Poland [57,71,73], Slovakia [97]    | Poland [70]                   | Poland [70-73]      | Poland [73]                                    |
| <i>Neotrombicula inopinata</i> (Oudemans, 1909)                          | Poland [72-73], Slovakia [82,97]                  | Poland [57], Slovakia [97]    | Poland [73]         | Poland [59], Slovakia [45,75]                  |
| <i>Neotrombicula japonica</i> (Tanaka, Kaiwa, Teramura and Kagaya, 1930) | Poland [57]                                       |                               |                     |                                                |
| <i>Neotrombicula talmiensis</i> (Schluger, 1955)                         | Poland [70], Slovakia [98]                        |                               | Poland [73,93]      | Poland [99]                                    |
| <i>Trombicula (Neotrombicula) zachvatkini</i> (Schluger, 1948)           | Poland [57,72 as <i>Hirsutiella zachvatkini</i> ] | Poland [57-70], Slovakia [45] | Poland [70]         |                                                |
| <i>Neotrombicula vulgaris</i> (Schluger, 1955)                           | Poland [99]                                       |                               | Poland [58]         |                                                |
| <i>Radfordia lemnina</i> (Koch, 1841)                                    | Poland [57]                                       |                               |                     | Poland [59]                                    |
| <b>Acari, Myobiidae</b>                                                  |                                                   |                               |                     |                                                |
| <i>Myobia musculi</i> (Schranck, 1781)                                   | Poland [57]                                       |                               |                     |                                                |
| <i>Protomyiobia onoi</i> Jameson and Dusbabek, 1971                      | Poland [71-73]                                    |                               |                     |                                                |
| <i>Protomyiobia claparedei</i> (Poppe,                                   | Germany [88],                                     |                               |                     |                                                |

|                                                              |                                                                                                      |                                                                 |                           |                                        |
|--------------------------------------------------------------|------------------------------------------------------------------------------------------------------|-----------------------------------------------------------------|---------------------------|----------------------------------------|
| 1896)                                                        | Poland [71,73]                                                                                       |                                                                 |                           |                                        |
| <b>Acari, Sarcoptiformes</b>                                 |                                                                                                      |                                                                 |                           |                                        |
| <i>Amorphacarus elongatus</i> (Poppe, 1896)                  | Germany [88, as <i>A. elongata</i> ], Poland [70]                                                    |                                                                 |                           |                                        |
| <i>Myocoptes japonensis</i> (Radford, 1955)                  | Poland [27,57]                                                                                       |                                                                 | Poland [27,58]            |                                        |
| <i>Myocoptes musculus</i> (Koch, 1844)                       | Poland [27]                                                                                          | Poland [27]                                                     | Poland [27]               |                                        |
| <i>Trichoecius tenax</i> (Michael, 1889)                     | Poland [27,57]                                                                                       |                                                                 |                           |                                        |
| <i>Listrophorus brevipes</i> Dubinina, 1968                  | Poland [27]                                                                                          | Poland [27]                                                     | Poland [27]               |                                        |
| <i>Psorergates baueri</i> Lukoschus, de Cock, Driessen, 1971 |                                                                                                      |                                                                 | Austria [100]             |                                        |
| <b>Siphonaptera, Ceratophyllidae</b>                         |                                                                                                      |                                                                 |                           |                                        |
| <i>Amalareus penicilliger</i> (Grube, 1851)                  | Poland [72], Austria [48], Slovakia [76,82,101-102]                                                  |                                                                 |                           |                                        |
| <i>Ceratophyllus hirundinis</i> (Curtis, 1826)               | Czech [103]                                                                                          |                                                                 |                           |                                        |
| <i>Megabothris turbidus</i> (Rothschild, 1909)               | Poland [26,72-73,104 (as <i>Ceratophyllus turbidus</i> ), 105], Czech [44, 106], Slovakia [22,33,38] |                                                                 | Slovakia [33,101,107-108] | Poland [105] Slovakia [38,101,107-108] |
| <i>Megabothris walkeri</i> (Rothschild, 1902)                | Poland [26,71, 104 (as <i>Ceratophyllus walkeri</i> )]                                               | Poland [104 (as <i>Ceratophyllus walkeri</i> ), Hungary [33,40] | Hungary [33,40]           |                                        |
| <i>Nosopsyllus fasciatus</i> (Bosc, 1800)                    | Slovakia [38,109], Hungary [110]                                                                     |                                                                 | Hungary [110]             | Slovakia [38]                          |
| <b>Siphonaptera, Leptopsyllidae</b>                          |                                                                                                      |                                                                 |                           |                                        |

|                                                   |                                                                                                         |                |  |                                           |
|---------------------------------------------------|---------------------------------------------------------------------------------------------------------|----------------|--|-------------------------------------------|
| <i>Amphipsylla rossica</i> Wagner, 1912.          |                                                                                                         | Czech [44]     |  |                                           |
| <i>Amphipsylla sibirica</i> (Wagner 1898)         | Austria [48]                                                                                            |                |  |                                           |
| <i>Leptopsylla segnis</i> (Schönherr, 1811)       | Poland [26], Czech [44 (as <i>Ctenopsyllus segnis</i> )]                                                |                |  |                                           |
| <i>Peromyscopsylla bidentata</i> (Kolenati, 1860) | Austria [48], Czech [44 (as <i>Ctenopsyllus bidentatus</i> ), 106], Slovakia [32,82,108], Hungary [110] | Slovakia [101] |  | Slovakia [101-102,107-108], Hungary [110] |
| <i>Peromyscopsylla fallax</i> (Rothschild, 1909)  | Slovakia [101,107], Hungary [111]                                                                       |                |  | Hungary [111]                             |
| <i>Peromyscopsylla silvatica</i> (Meinert, 1896)  | Poland [26,57], Czech [103]                                                                             |                |  |                                           |

#### Siphonaptera, Ctenophthalmidae

|                                                      |                                                                                                                                                  |                                                           |                                                                                 |                                                                |
|------------------------------------------------------|--------------------------------------------------------------------------------------------------------------------------------------------------|-----------------------------------------------------------|---------------------------------------------------------------------------------|----------------------------------------------------------------|
| <i>Ctenophthalmus agyrtes</i> (Heller, 1896)         | Germany [112], Poland [26,57,71,104-105,113], Austria [48,114], Czech [35,42,44,103,106], Slovakia [22,33,38,82,101-102] Hungary [33,40,110-111] | Poland [26,57,104-105], Czech [44], Slovakia [38,109,115] | Poland [26,104-105], Czech [42,44], Slovakia [82,101-102,107], Hungary [40,110] | Poland [105], Austria [48], Slovakia [38], Hungary [33,37,110] |
| <i>Ctenophthalmus assimilis</i> (Taschenberg, 1880)  | Poland [26,57,71-72,104-105], Czech [35,42,44], Slovakia [22,33,38,101], Hungary [33,40,110]                                                     | Poland [104], Czech [44], Slovakia [38]                   | Poland [104-105], Czech [44], Slovakia [33,101,107], Hungary [33,40]            | Slovakia [22,38], Hungary [110]                                |
| <i>Ctenophthalmus bisoctodentatus</i> Kolenati, 1863 | Czech [44], Slovakia [101,107]                                                                                                                   |                                                           | Poland [105]                                                                    |                                                                |

|                                                           |                                                                                                |                                                                                     |                                                                                         |                                                          |
|-----------------------------------------------------------|------------------------------------------------------------------------------------------------|-------------------------------------------------------------------------------------|-----------------------------------------------------------------------------------------|----------------------------------------------------------|
| <i>Ctenophthalmus congerer</i> Rothschild, 1907           | Poland [57], Austria [48]                                                                      |                                                                                     | Czech [44], Hungary [33]                                                                |                                                          |
| <i>Ctenophthalmus obtusus</i> Jordan et Rothschild 1912   | Poland [113], Slovakia [116]                                                                   |                                                                                     | Poland [113]                                                                            |                                                          |
| <i>Ctenophthalmus solutus</i> Jordan et Rothschild, 1920  | Poland [105], Slovakia [38,107,101], Hungary [111,117]                                         |                                                                                     | Czech [44], Slovakia [101,107]                                                          | Slovakia [38,101,107]                                    |
| <i>Ctenophthalmus uncinatus</i> (Wagner, 1898)            | Poland [26,72], Slovakia [82,118]                                                              | Poland [72]                                                                         | Slovakia [102]                                                                          |                                                          |
| <i>Rhadinopsylla integella</i> Jordan et Rothschild, 1921 | Austria [48], Czech (106), Slovakia [82,119]                                                   |                                                                                     |                                                                                         |                                                          |
| <i>Rhadinopsylla isacantha</i> (Rothschild, 1907)         | Slovakia [120]                                                                                 |                                                                                     |                                                                                         |                                                          |
| <i>Rhadinopsylla mesoides</i> Smit, 1957                  | Slovakia [120]                                                                                 |                                                                                     |                                                                                         |                                                          |
| <i>Rhadinopsylla pentacantha</i> (Rothschild, 1897)       | Slovakia [101,107], Hungary [117]                                                              |                                                                                     |                                                                                         |                                                          |
| <b>Siphonaptera, Hystrichopsyllidae</b>                   |                                                                                                |                                                                                     |                                                                                         |                                                          |
| <i>Hystrichopsylla orientalis</i> Smit, 1956              | Poland [26,60,105,113], Slovakia [82], Hungary [10-111,121]                                    | Poland [60]                                                                         | Poland [26,60,105], Slovakia [108]                                                      | Poland [60], Slovakia [115], Hungary [33,110,121]        |
| <i>Hystrichopsylla talpae</i> (Curtis, 1826)              | Poland [26,57,60,72,113], Austria [48,114], Czech [35,42,44,106], Slovakia [38,101]            |                                                                                     | Poland [60], Czech [42,44], Slovakia [101,107], Hungary [121]                           |                                                          |
| <i>Doratopsylla dasyncnema</i> (Rothschild, 1897)         | Germany [112], Poland [26,57,72,105,113], Austria [48,114], Czech [35,42,44,103,106], Slovakia | Poland [26,113], Austria [48], Czech [35,42,44,103], Slovakia [38,101,107,109,115], | Poland [26,73,105,113], Czech [42,44,103], Slovakia [101-102,107,108], Hungary [33,110] | Czech [44], Slovakia [101,107-108], Hungary [33,110-111] |



|                                                     |                                                                                                                                                                                |                                                                                              |                                                                                                                        |                                                                                                              |
|-----------------------------------------------------|--------------------------------------------------------------------------------------------------------------------------------------------------------------------------------|----------------------------------------------------------------------------------------------|------------------------------------------------------------------------------------------------------------------------|--------------------------------------------------------------------------------------------------------------|
|                                                     | [22,38,82,101-102,107,115],<br>Hungary [33,110-111,117]                                                                                                                        | Hungary [87]                                                                                 |                                                                                                                        |                                                                                                              |
| <i>Palaeopsylla kohauti</i> Dampf, 1911             | Austria [48,114], Czech<br>(106), Slovakia [101,122],<br>Hungary [33,110]                                                                                                      |                                                                                              | Slovakia [101-102]                                                                                                     | Hungary [110]                                                                                                |
| <i>Palaeopsylla similis</i> Dampf, 1910             | Czech [35,42,44,106],<br>Slovakia [33,101,107,109]                                                                                                                             |                                                                                              | Poland [105], Slovakia<br>[101,107]                                                                                    | Slovakia [82,102,107]                                                                                        |
| <i>Palaeopsylla soricis</i> (Dale, 1878)            | Germany [112], Poland<br>[26,57,71-73,104-105,113],<br>Austria [48,114], Czech<br>[35,42,44,103,106], Slovakia<br>[22,33,38,82,101,102,107,115],<br>Hungary [75-76, 78-79, 87] | Poland [26,104-105,113],<br>Austria [48], Czech<br>[35,42,44], Slovakia<br>[101,107,109,115] | Poland<br>[26,72-73,104-105,113],<br>Czech [42,44,103], Slovakia<br>[82,101-102,107-108], Hun-<br>gary [33,40,110-111] | Poland [26,72,105], Austria<br>[48], Czech [44,103],<br>Slovakia<br>[22,38,82,101-102,107],<br>Hungary [110] |
| <i>Palaeopsylla steini</i> Jordan 1932              | Czech [44], Slovakia [82]                                                                                                                                                      |                                                                                              | Slovakia [82]                                                                                                          |                                                                                                              |
| <b>Anoplura</b>                                     |                                                                                                                                                                                |                                                                                              |                                                                                                                        |                                                                                                              |
| <i>Hoplopleura acanthopus</i><br>(Burmeister, 1839) | Poland [57,71-73], Slovakia<br>[83,123-125]                                                                                                                                    | Poland [126], Slovakia [124]                                                                 | Poland [127], Slovakia [124]                                                                                           | Poland [72], Slovakia [124]                                                                                  |
| <i>Hoplopleura affinis</i> (Burmeister,<br>1839)    | Slovakia [81,124-125]                                                                                                                                                          | Slovakia [124-125]                                                                           |                                                                                                                        |                                                                                                              |
| <i>Hoplopleura edentula</i> Fahrenholz,<br>1916     | Poland [57,71,127], Slovakia<br>[82,124]                                                                                                                                       | Slovakia [124], Hungary<br>[28]                                                              | Poland [59], Slovakia [124]                                                                                            | Poland [59], Slovakia [124]                                                                                  |
| <i>Polyplax reclinata</i> (Nitzsch, 1864)           | Slovakia [128], Hungary [28]                                                                                                                                                   | Slovakia [128], Hungary<br>[28]                                                              | Hungary [28]                                                                                                           |                                                                                                              |
| <i>Polyplax serrata</i> (Burmeister,<br>1839)       | Poland [71-73,127], Slovakia<br>[124-125]                                                                                                                                      | Poland [73], Slovakia [124]                                                                  | Poland [59], Slovakia [124]                                                                                            |                                                                                                              |
